# Supplementary material for: Protonated canthaxanthins as models for blue carotenoproteins
Source: Royal Society of Chemistry journal article supplement (doi:10.1039/b313639f), 2004-01-01

1H NMR spectra (500 MHz, CD2Cl2, -15C) of (from above)

1. Canthaxanthin treated with CF3COOD from Acros, providing monocations **9**, **10**, **12**, **13**.
2. Canthaxanthin treated with CF3COOD from Sigma, providing monocations **9** and **10**.
3. Canthaxanthin treated with CF3SO3D, providing trication **14**.


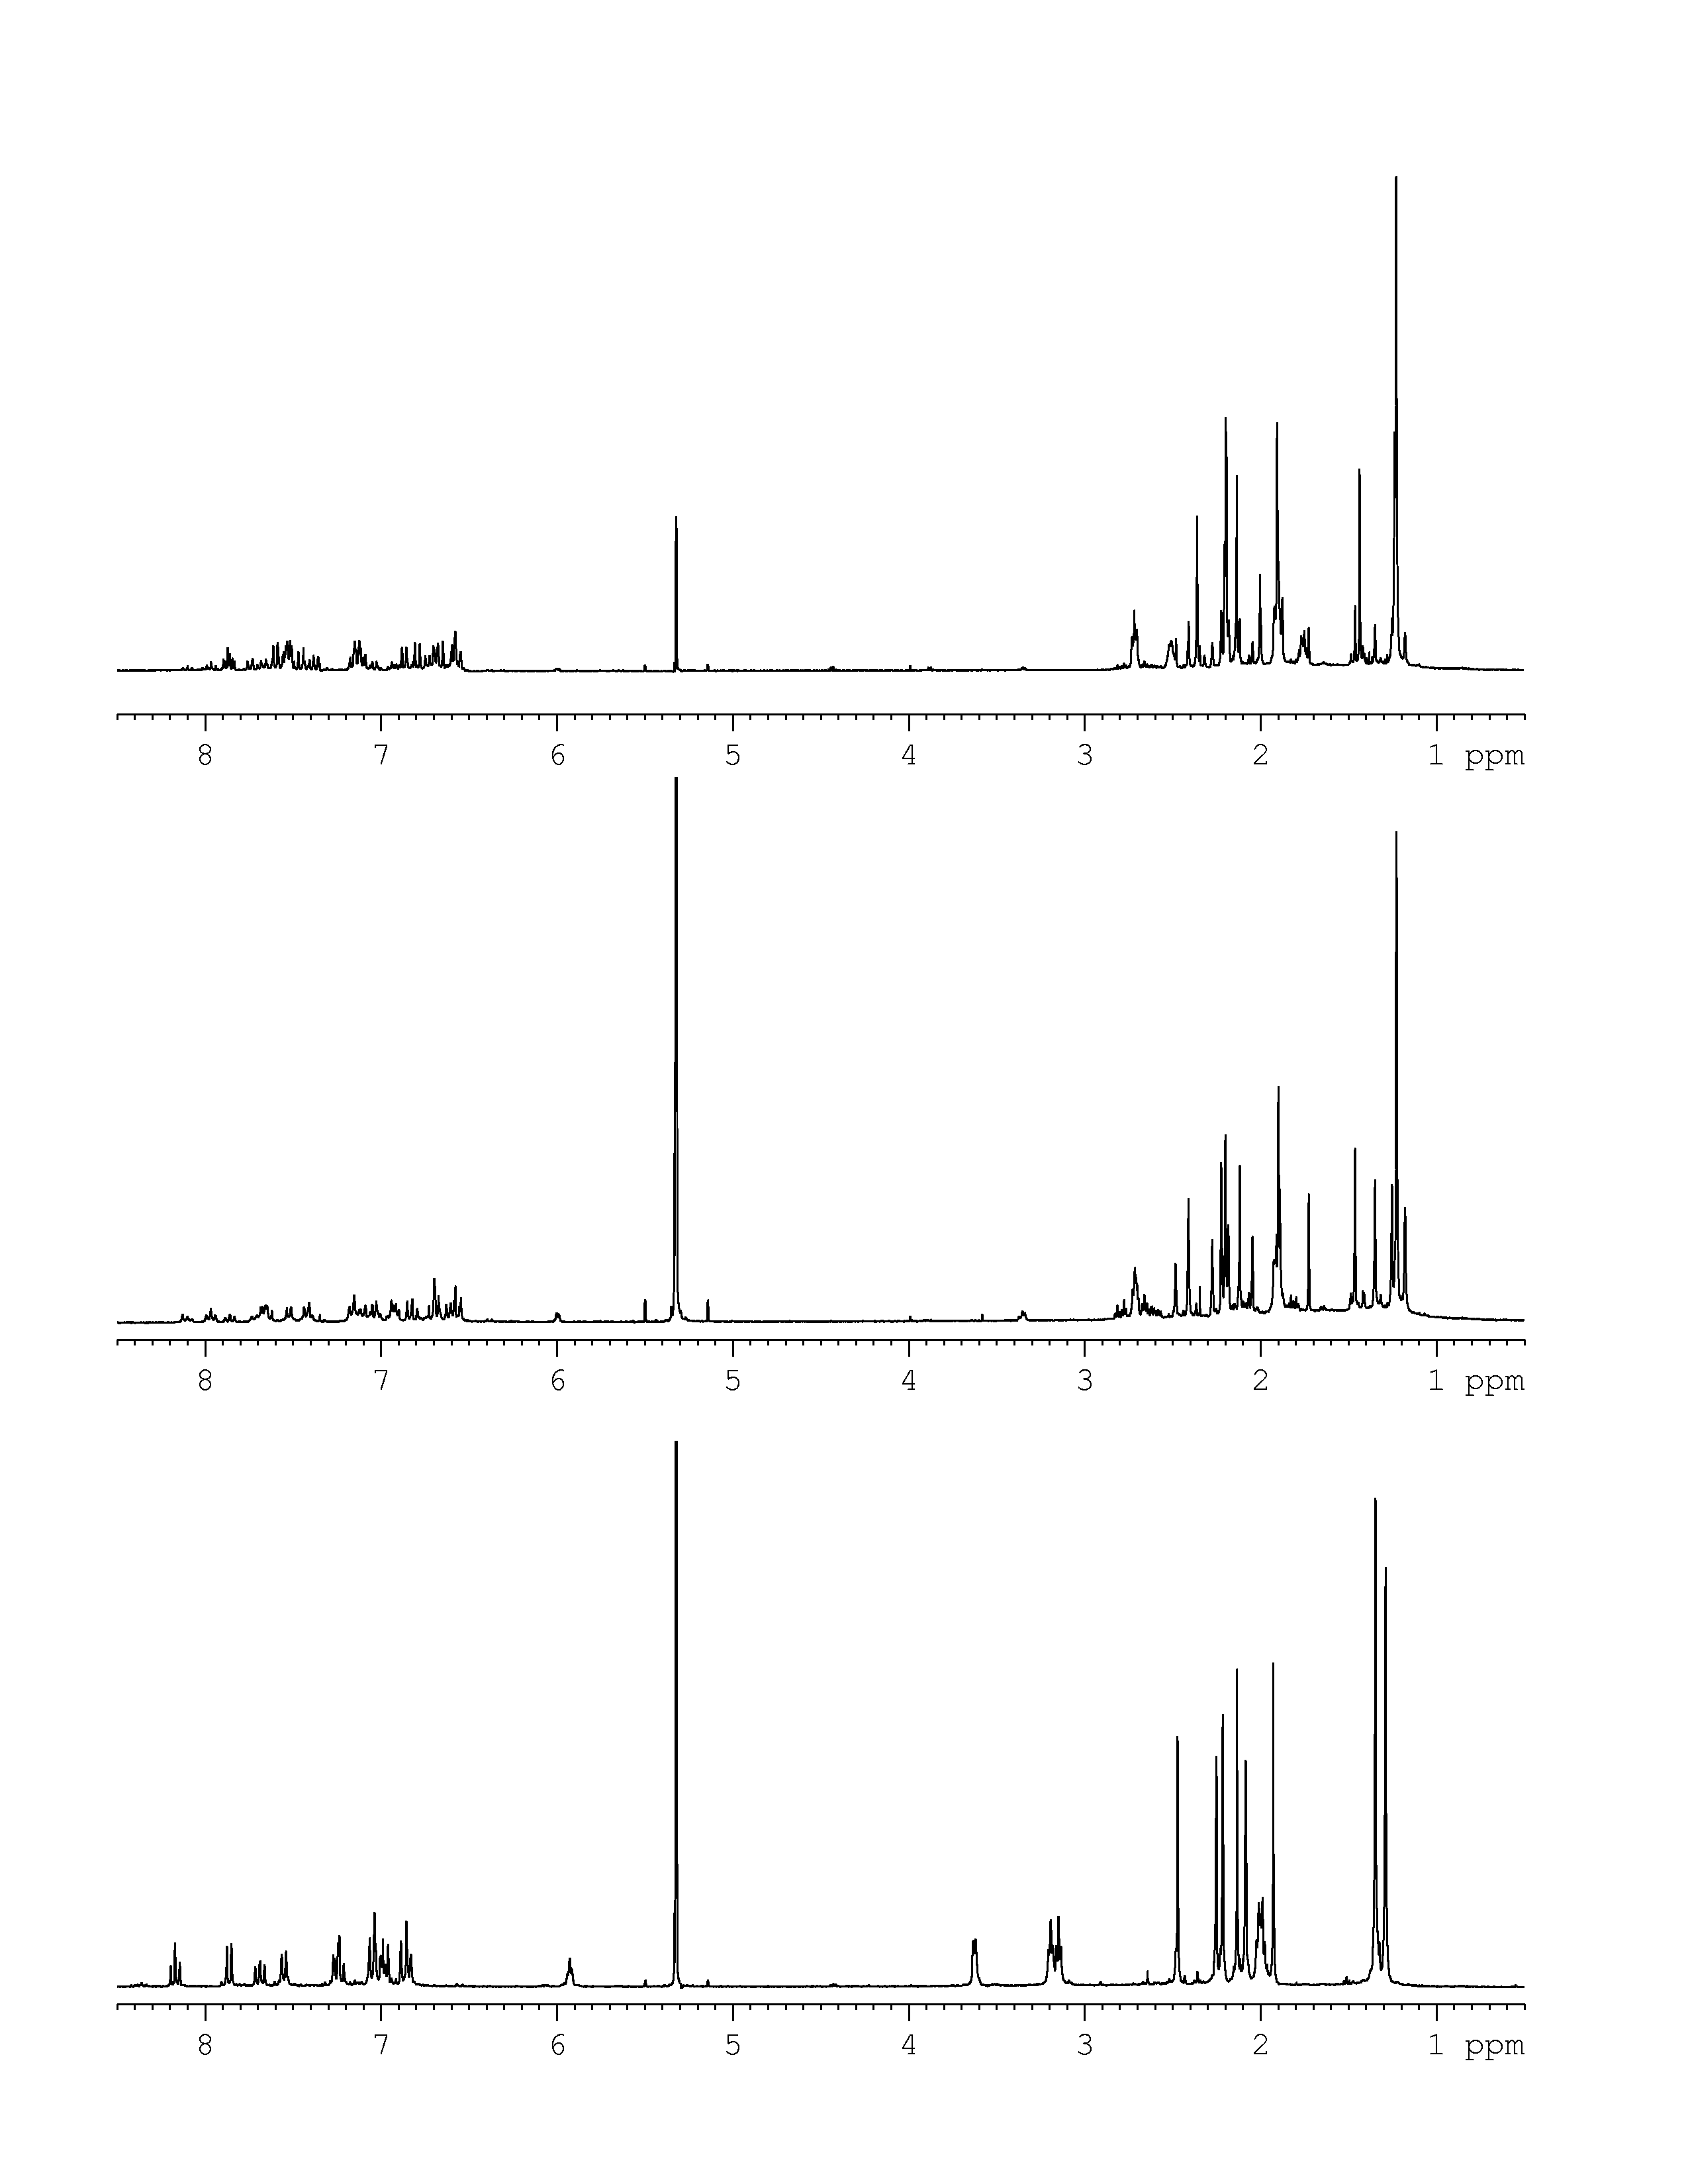


Expansion of low-field part of 1H NMR spectra.


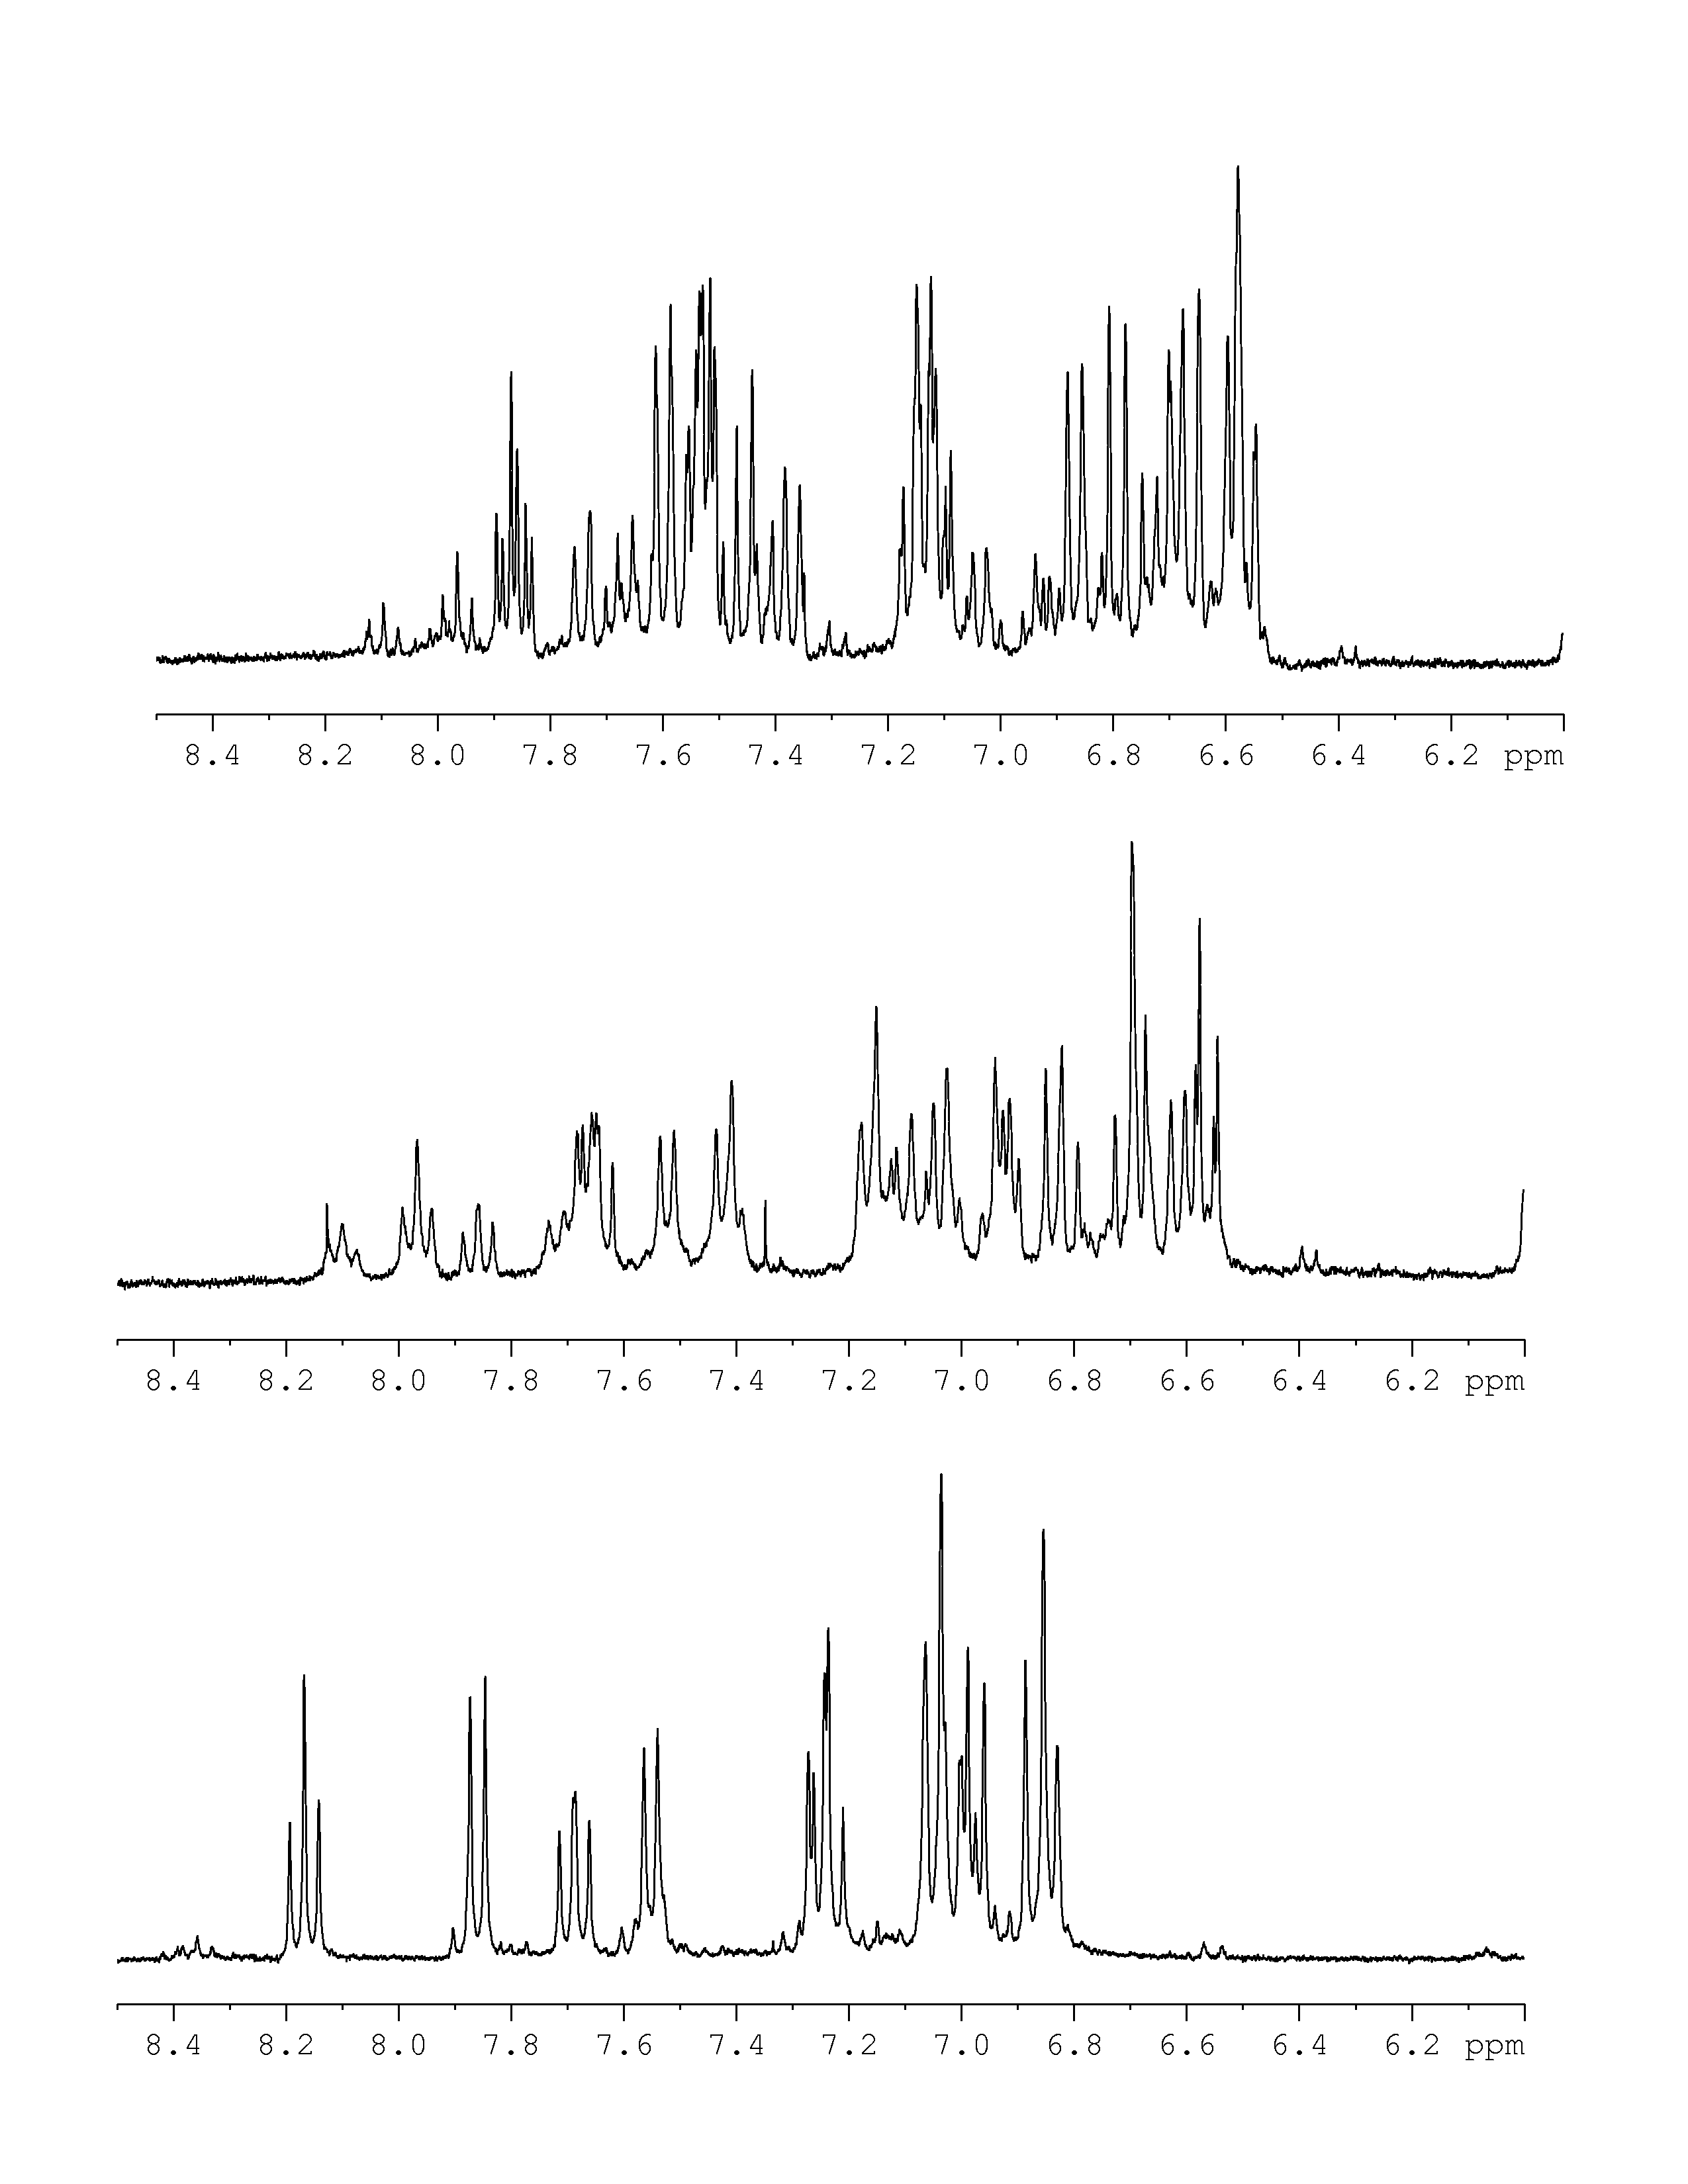


Expansion of high-field part of 1H NMR spectra.


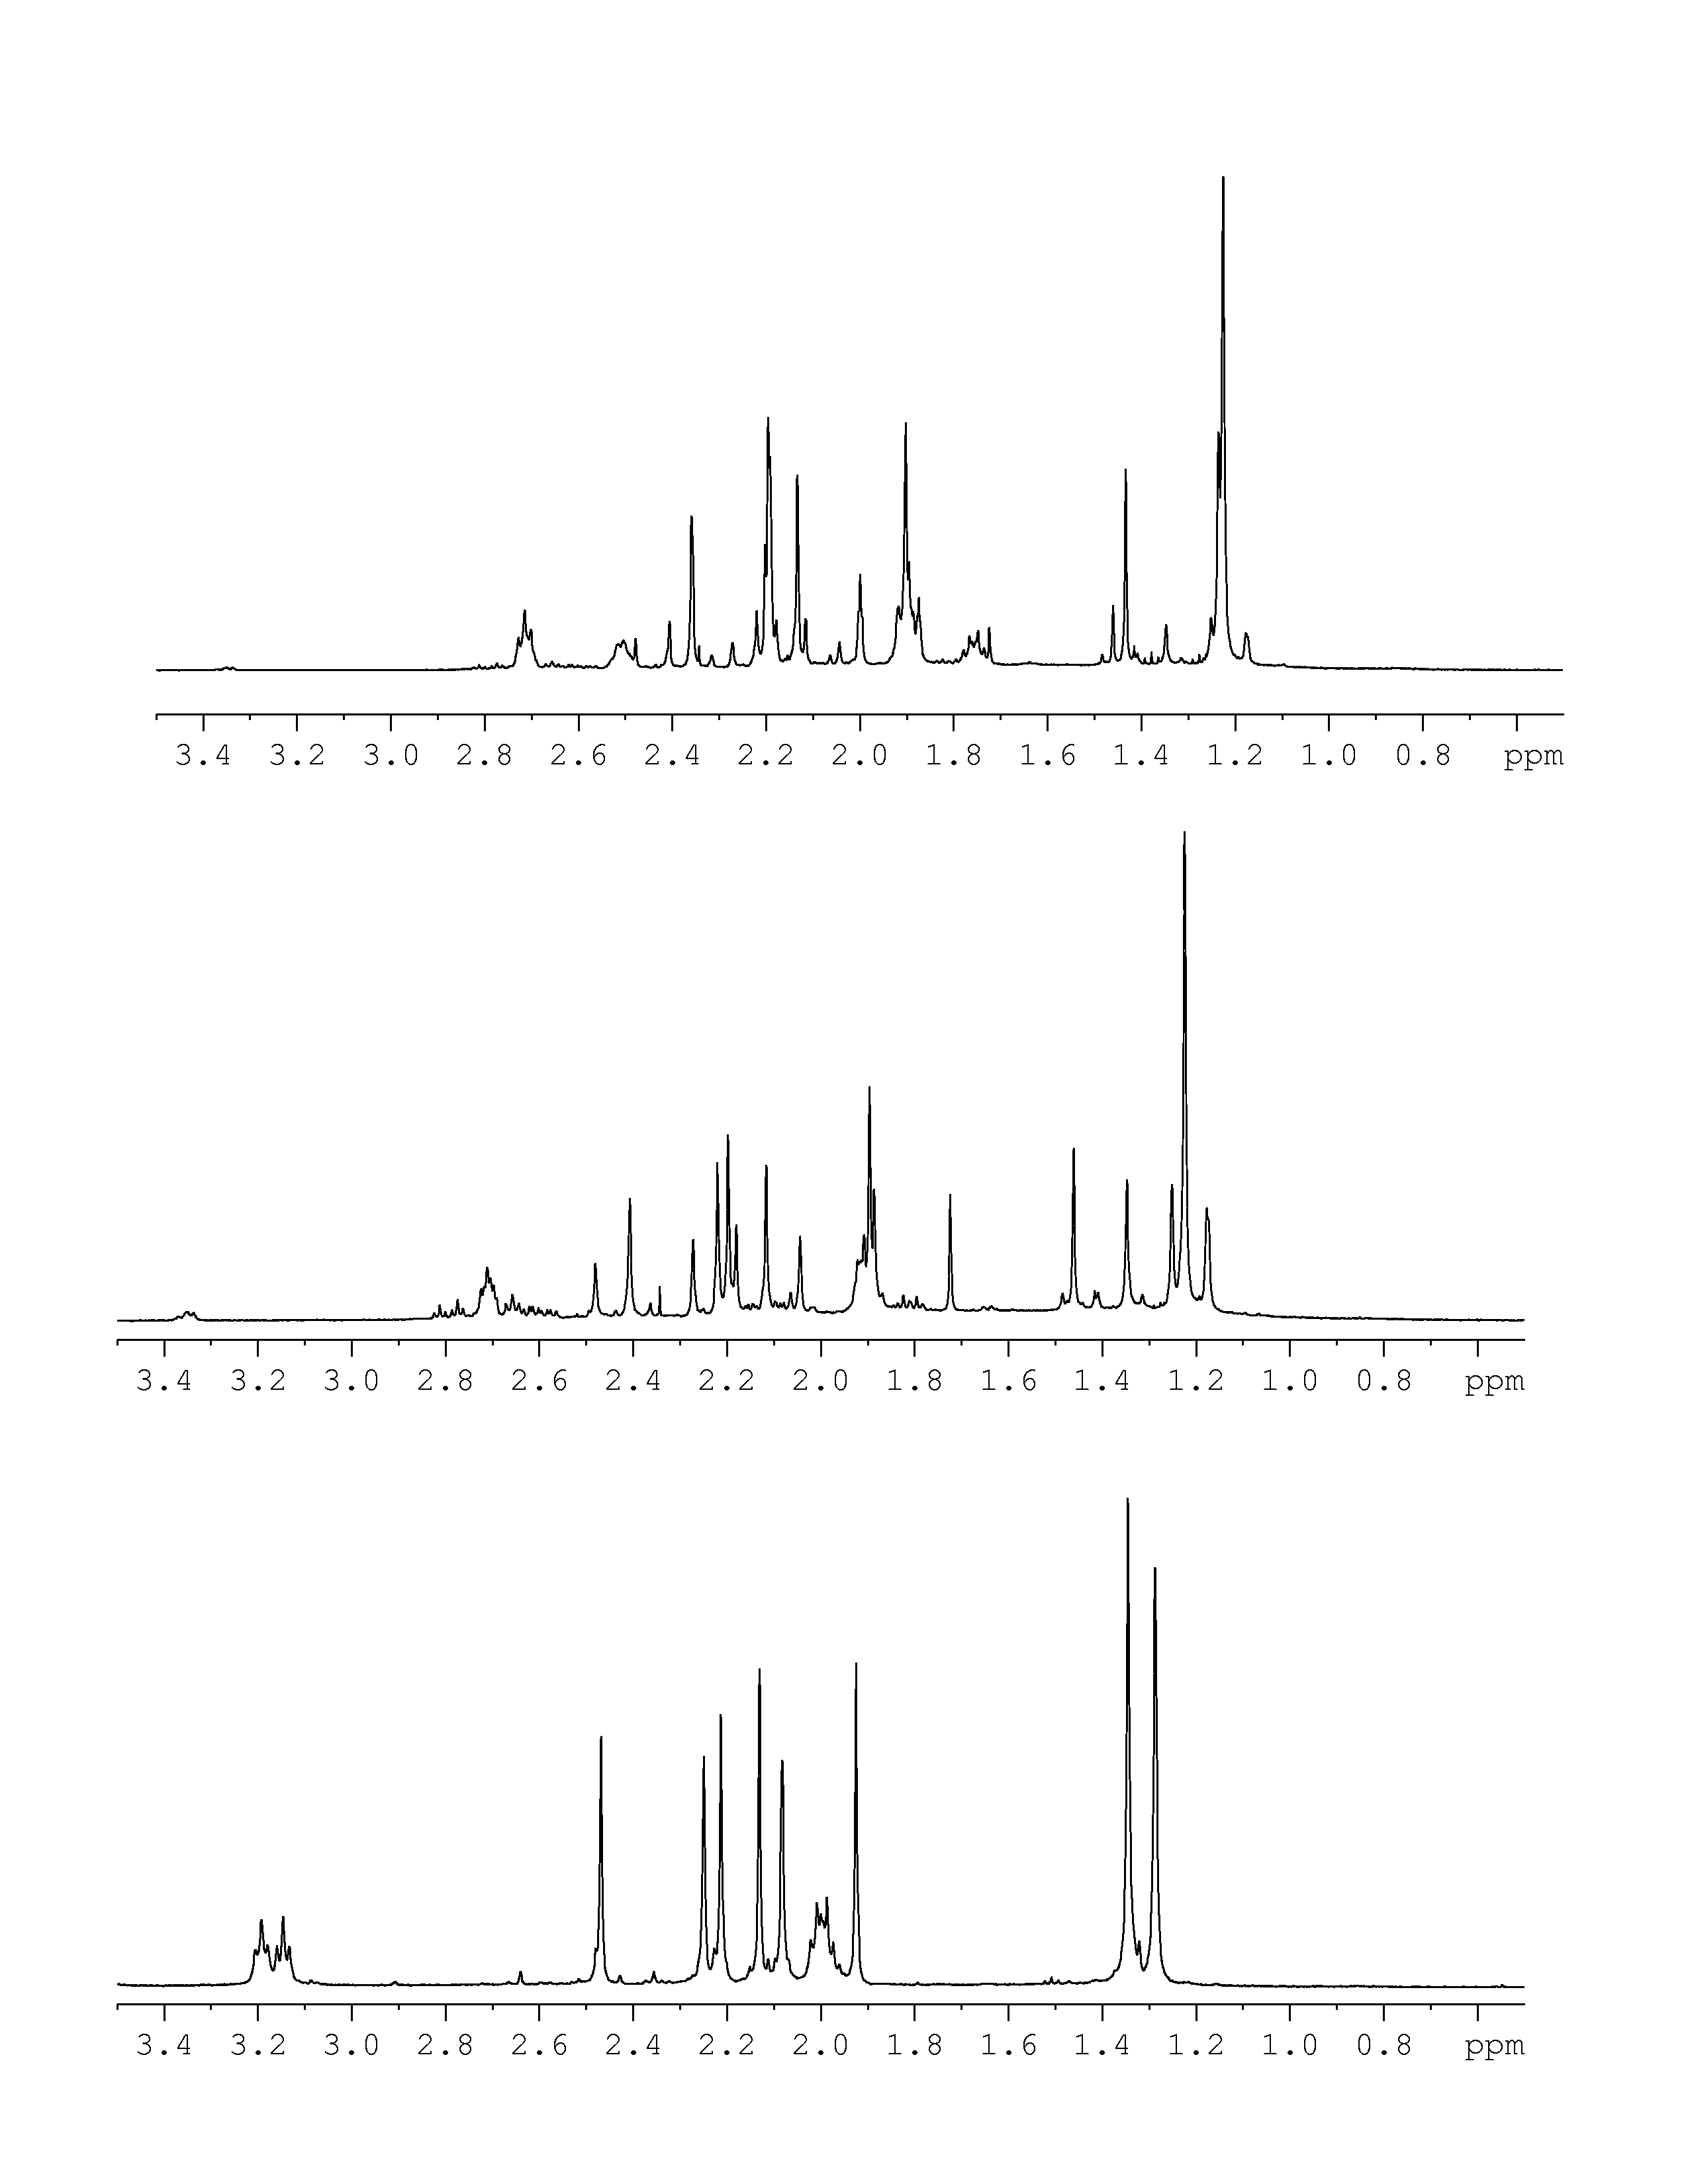


2D ROESY spectrum of the trikation **14**.


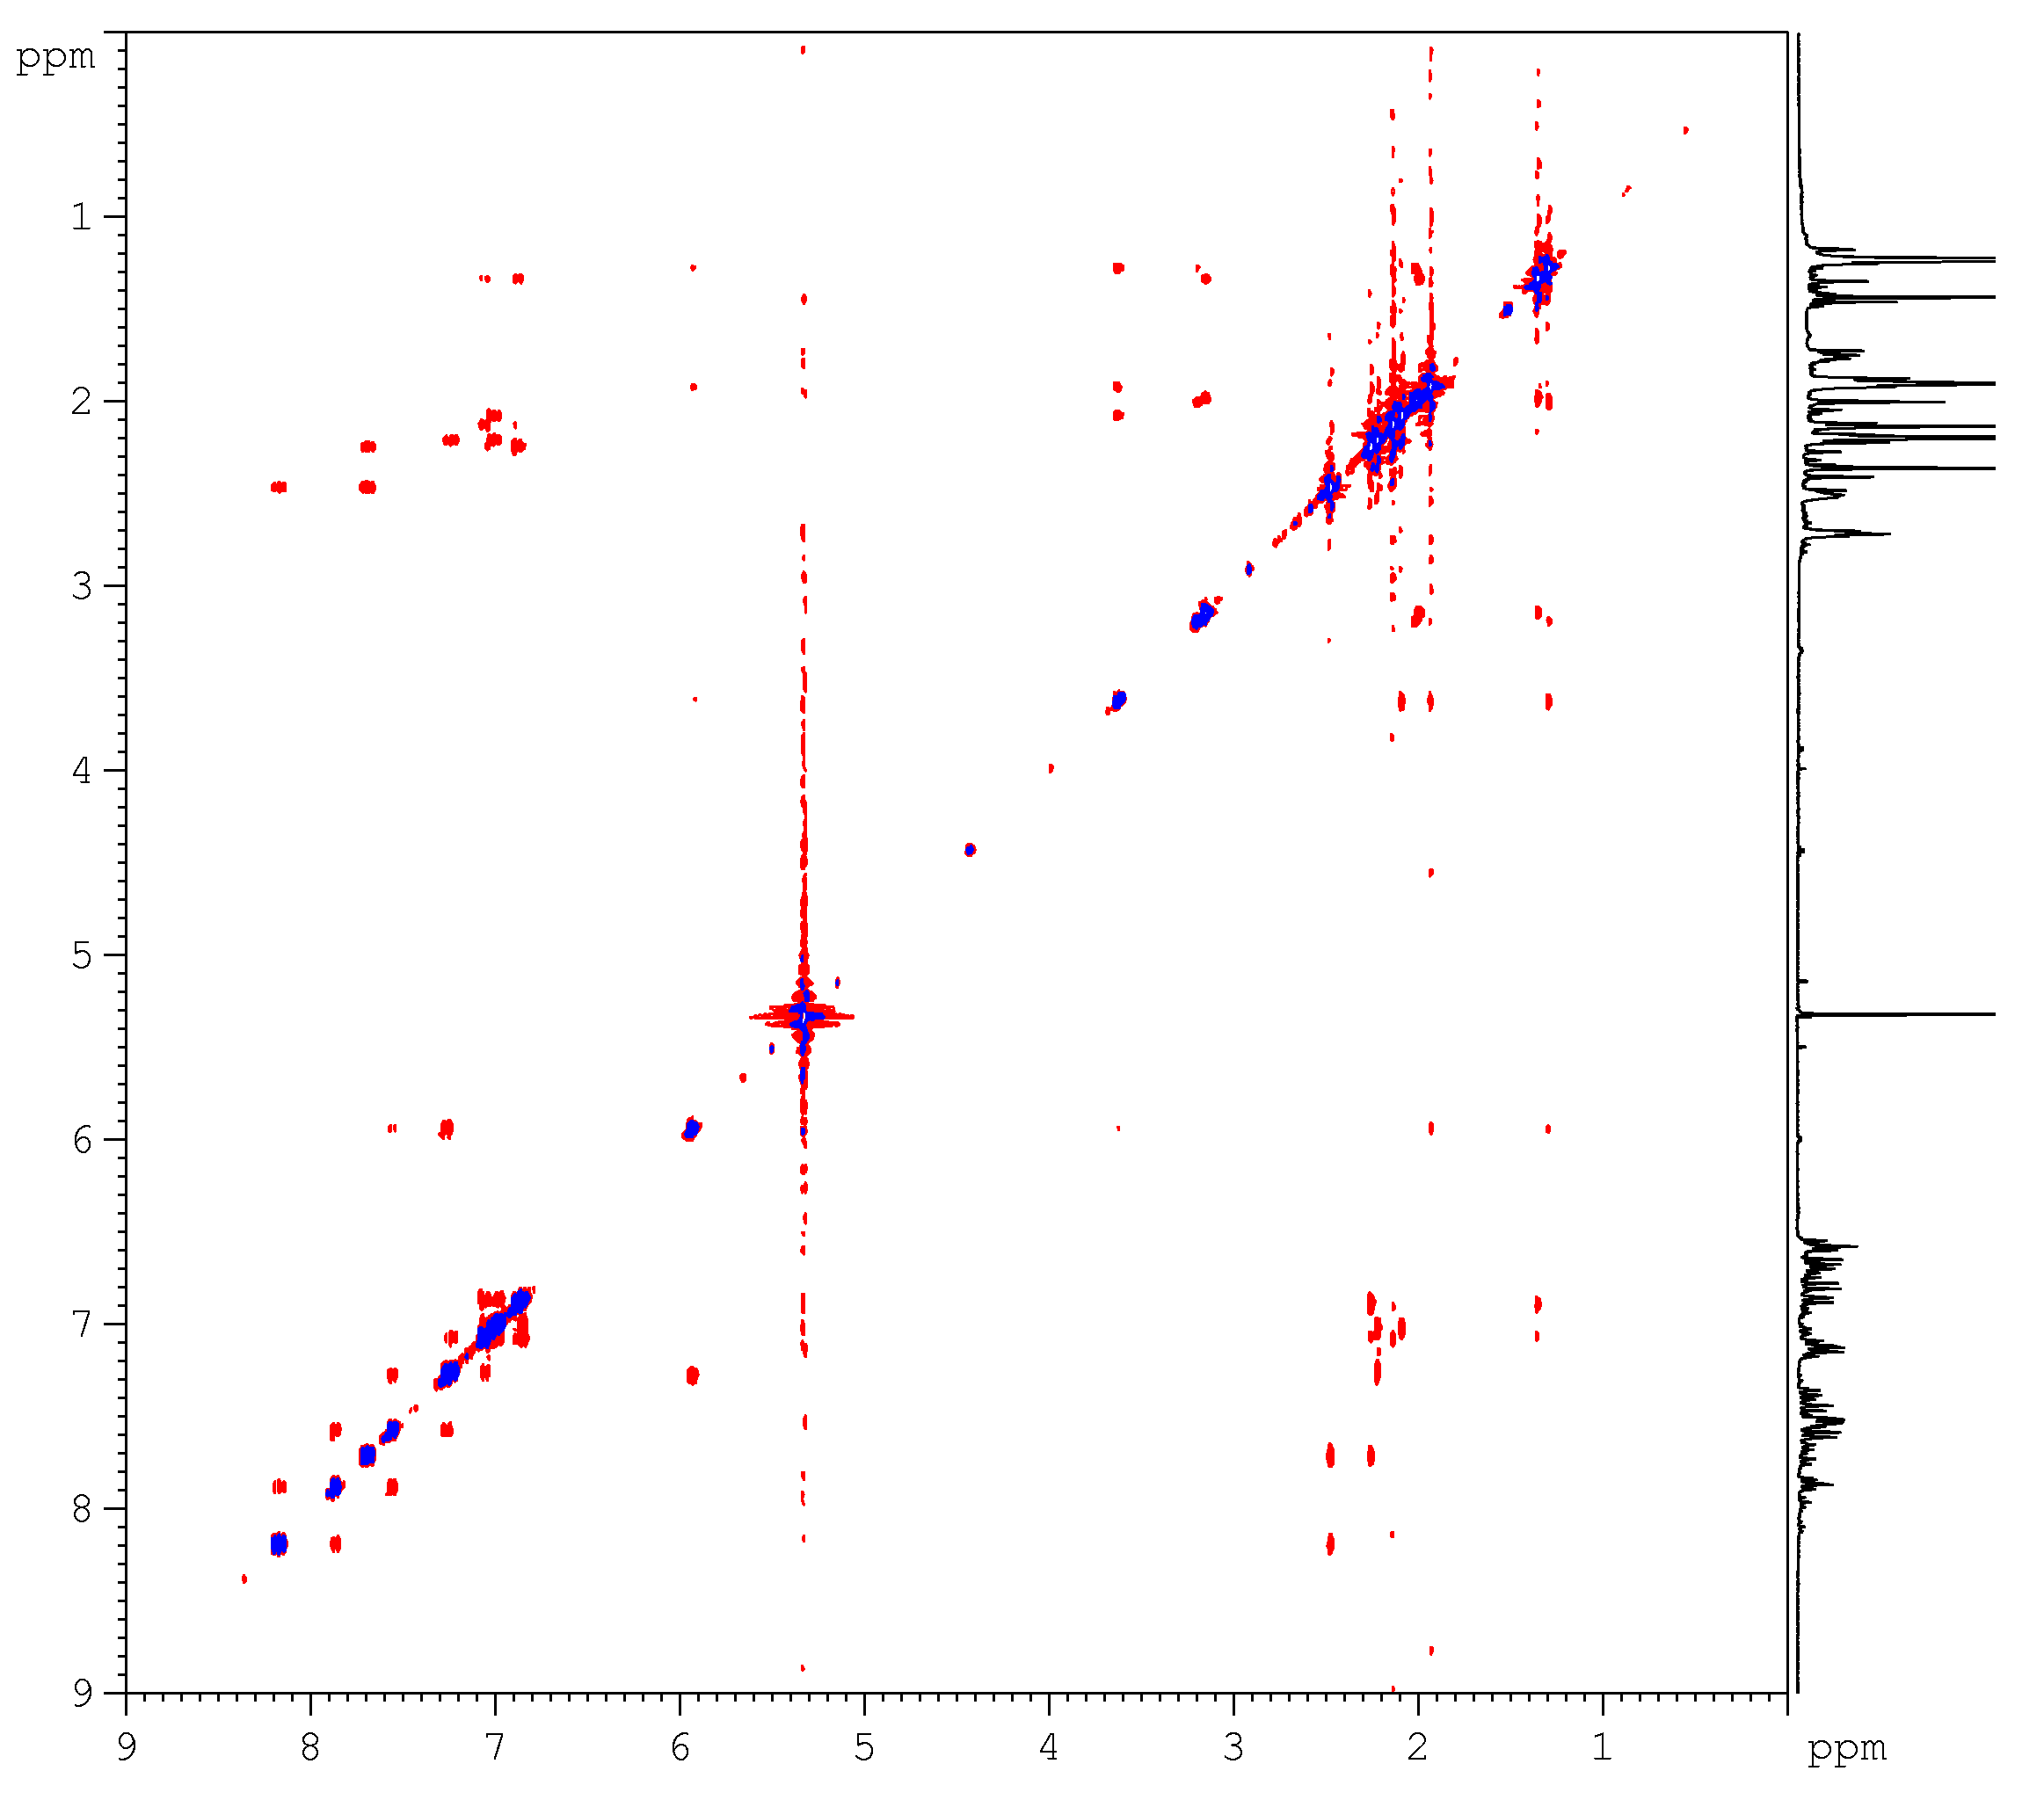


2D ROESY spectrum of the monocation **9** and **10**, prepared from canthaxanthin by treatment with CF3COOD from Sigma.


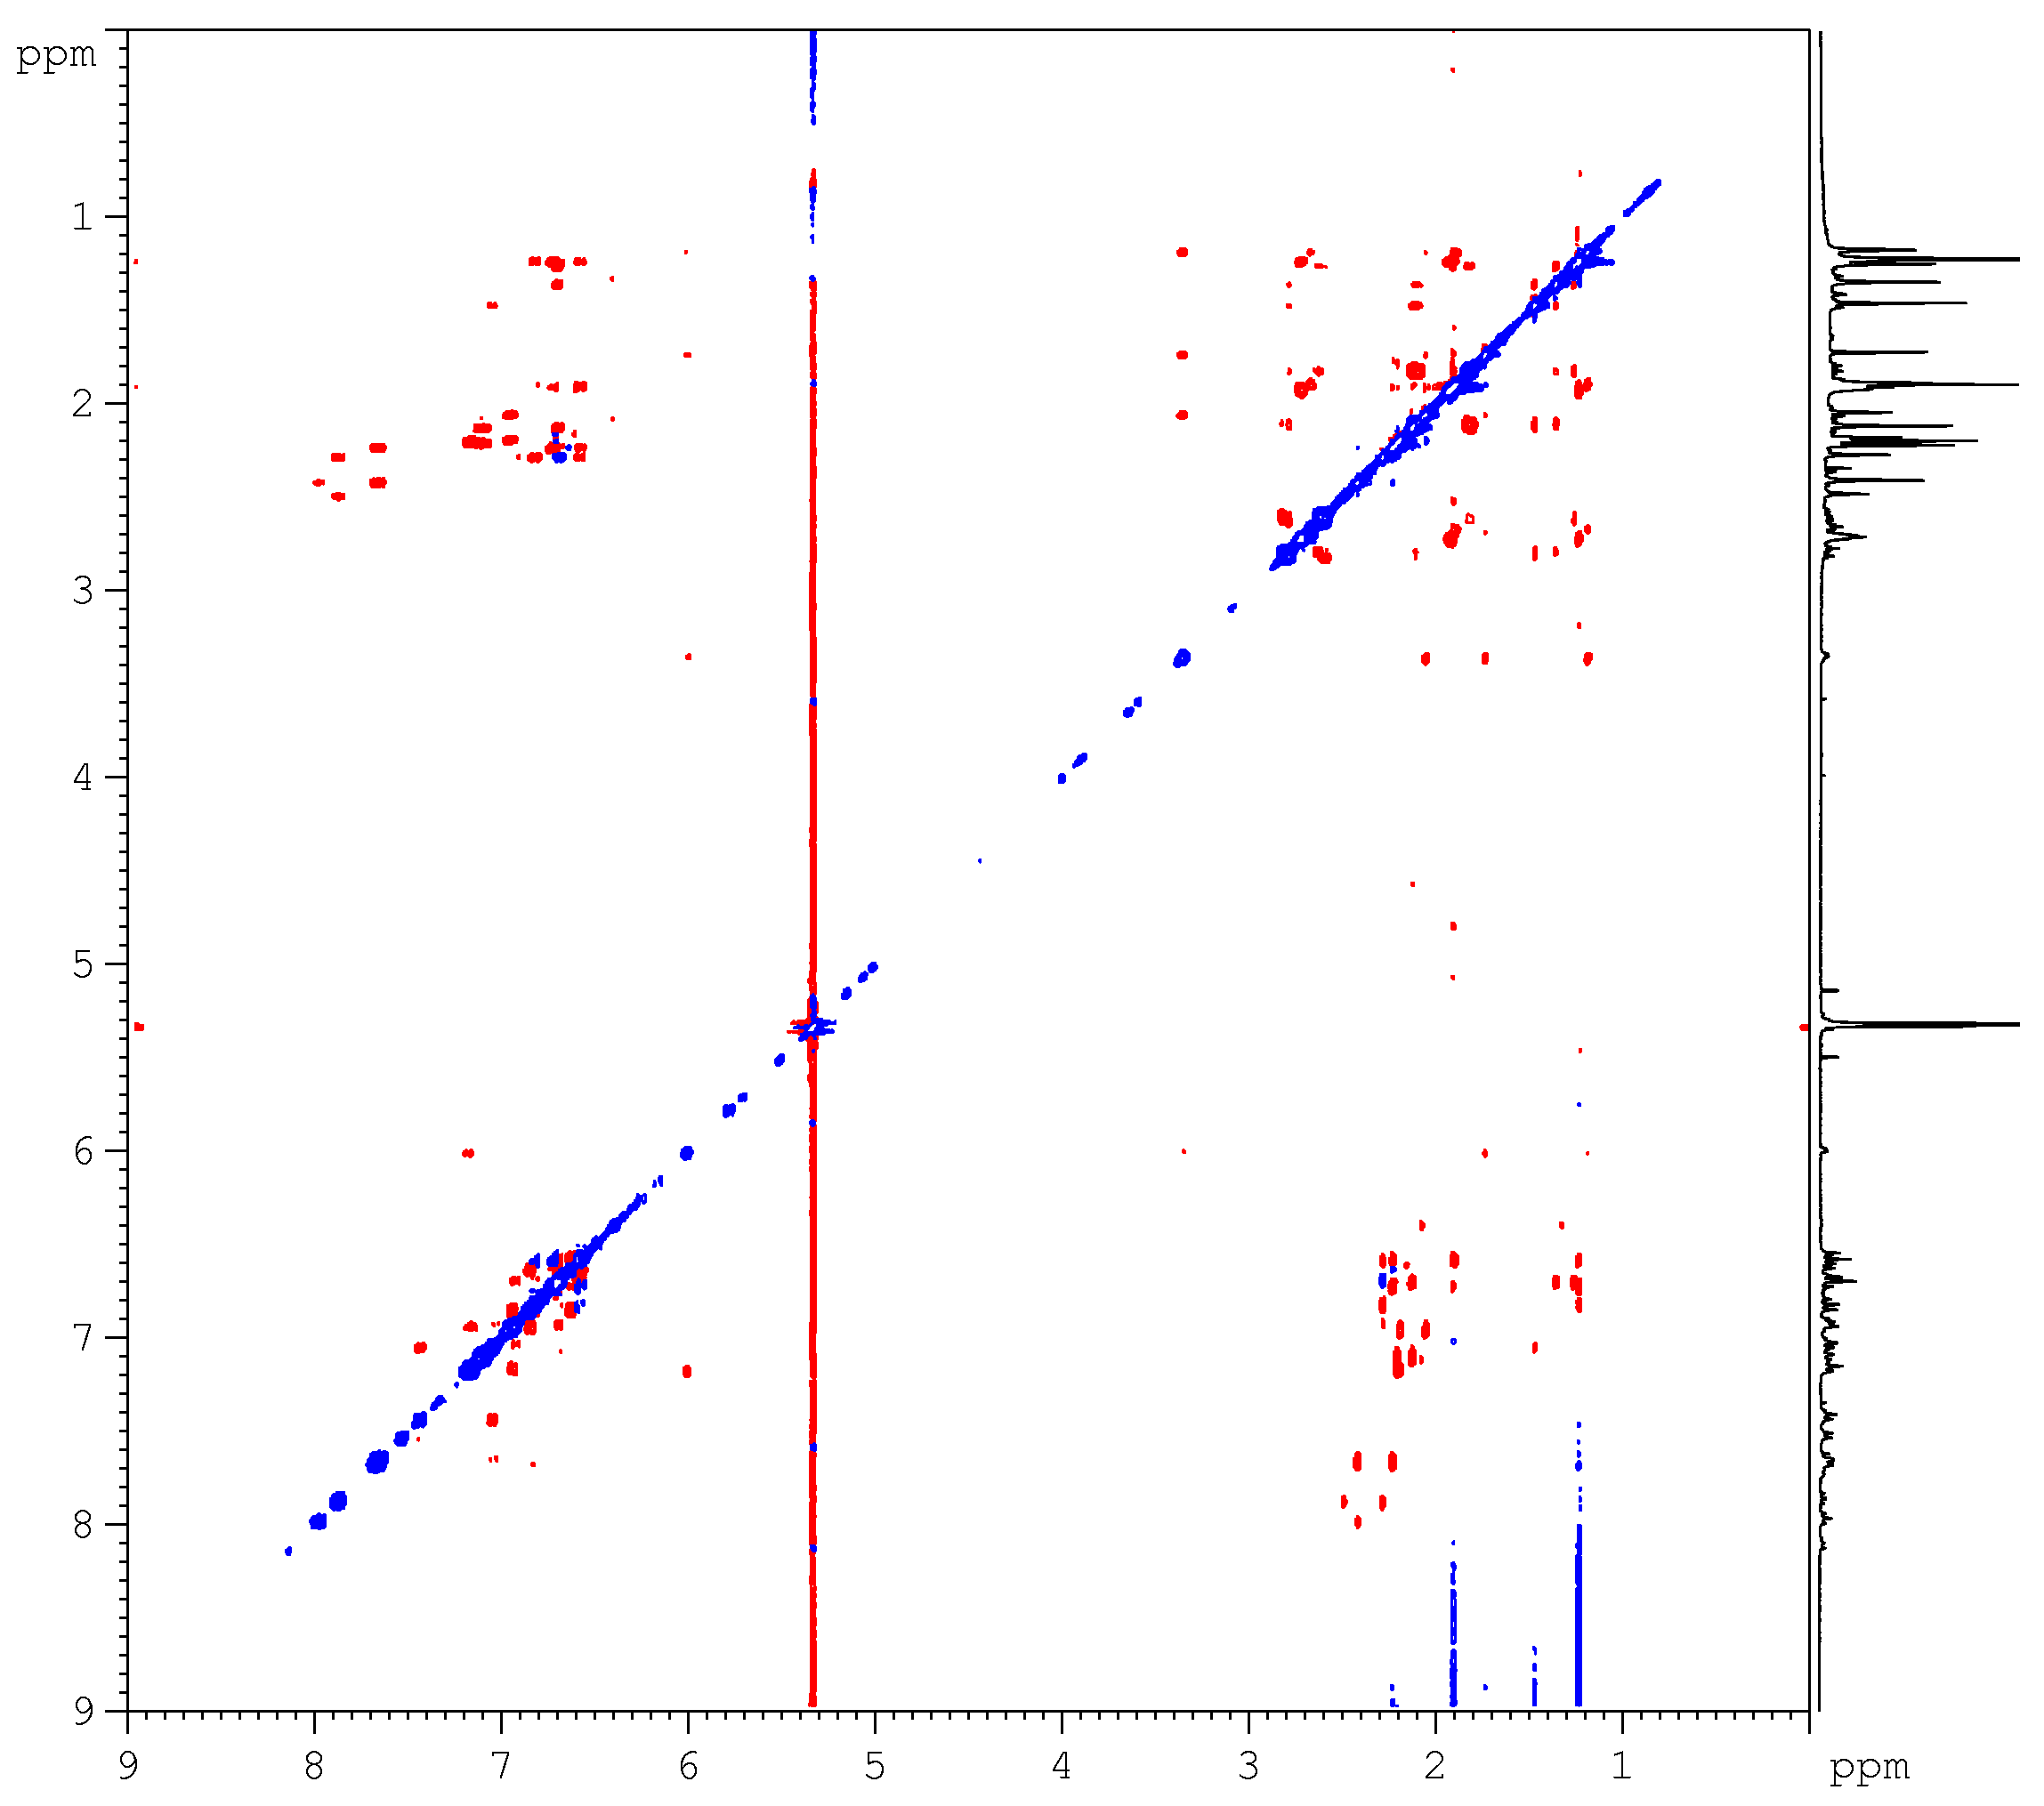

Supplement: b313639f.doc [file b313639f.doc]
